# Supplementary material
Source: publisher figshare collection journal article supplement (https://frontiersin.figshare.com/ndownloader/files/22672052)
Supplement: Supplementary file [file 22672052]

# ETS1 suppresses Tumorigenesis of Human Breast Cancer via Trans-Activation of Canonical Tumor Suppressor Genes

*Gi-Cheon Kim<sup>1,2</sup>, Choong-Gu Lee<sup>3</sup>, Ravi Verma<sup>4</sup>, Dipayan Rudra<sup>4</sup>, Taemook Kim<sup>5</sup>,  
Keunsoo Kang<sup>6</sup>, Jong Hee Nam<sup>7</sup>, Young Kim<sup>8</sup>, Sin-Hyeog Im<sup>4,9</sup> and Ho-Keun Kwon<sup>1,2,10\*</sup>*

<sup>1</sup> Department of Microbiology and Immunology, Yonsei University College of Medicine, Seoul, South Korea, <sup>2</sup> Institute for Immunology and Immunological Diseases, Yonsei University College of Medicine, Seoul, South Korea, <sup>3</sup> Natural Product Informatics Research Center, Korea Institute of Science and Technology (KIST), Gangneung Institute of Natural Products, Gangneung, South Korea, <sup>4</sup> Academy of Immunology and Microbiology (AIM), Institute for Basic Science (IBS), Pohang, 37673, Republic of Korea, <sup>5</sup> Department of Biological Sciences, Korea Advanced Institute of Science and Technology, Daejeon, South Korea, <sup>6</sup> Department of Microbiology, College of Natural Sciences, Dankook University, Cheonan, South Korea, <sup>7</sup> Chonnam National University Medical School, Gwangju, South Korea, <sup>8</sup> Department of Oral Pathology, School of Dentistry, Chonnam National University, Gwangju, South Korea, <sup>9</sup> Division of Integrative Biosciences and Biotechnology, Department of Life Sciences, Pohang University of Science and Technology, Pohang, South Korea, <sup>10</sup> Brain Korea 21 PLUS Project for Medical Sciences, Yonsei University College of Medicine, Seoul, South Korea

\*Correspondence: HK@yuhs.ac

**\*Address correspondence to:** Dr. Ho-Keun Kwon, Department of Microbiology and Immunology, Yonsei University College of Medicine; Brain Korea 21 PLUS Project for Medical Sciences, Institute for Immunology and Immunological Diseases. 50-1 Yonse-ro, Seodaemin-gu, Seoul, South Korea, 03722; Tel: 82-2-2228-1818; Email: HK@yuhs.ac

# Supplementary Information

**Supplementary Figure 1.** Comparison of *ETS1* expression between normal and tumor patient specimens in publically available dataset (Curtis).

**Supplementary Figure 2.** Comparison of *ETS1* expression between normal and tumor patient specimens in diverse cancer types.

**Supplementary Figure 3.** DNA methylation status on *ETS1* promoter (locus #1) in diverse normal and tumor specimens.

**Supplementary Figure 4.** ETS1 inhibits the proliferation and growth of MCF-7 breast cancer cells *in vitro* as well as *in vivo*.

**Supplementary Figure 5.** Bioinformatic analysis of promoter regions of representative ETS1 target genes

**Supplementary Figure 6.** Full Immuno-blots of the experiments

**Supplementary Table 1.** Primer sequences used for qRT-PCR

**Supplementary Table 2.** Primer sequences used for ChIP-PCR.

**Supplementary Table 3.** Correlation between methylation value of CpG site and *ETS1* expression in normal and tumor specimens.

**Supplementary Table 4.** Differential expressed genes (DEGs) in RNA-seq

**Supplementary Table 5.** Gene Ontology of DEG

**Supplementary Table 6.** List of Tumor suppressor genes (TSGs)

**Supplementary Table 7.** Overlap DEGs with TSGs

Supplementary Figure 1.

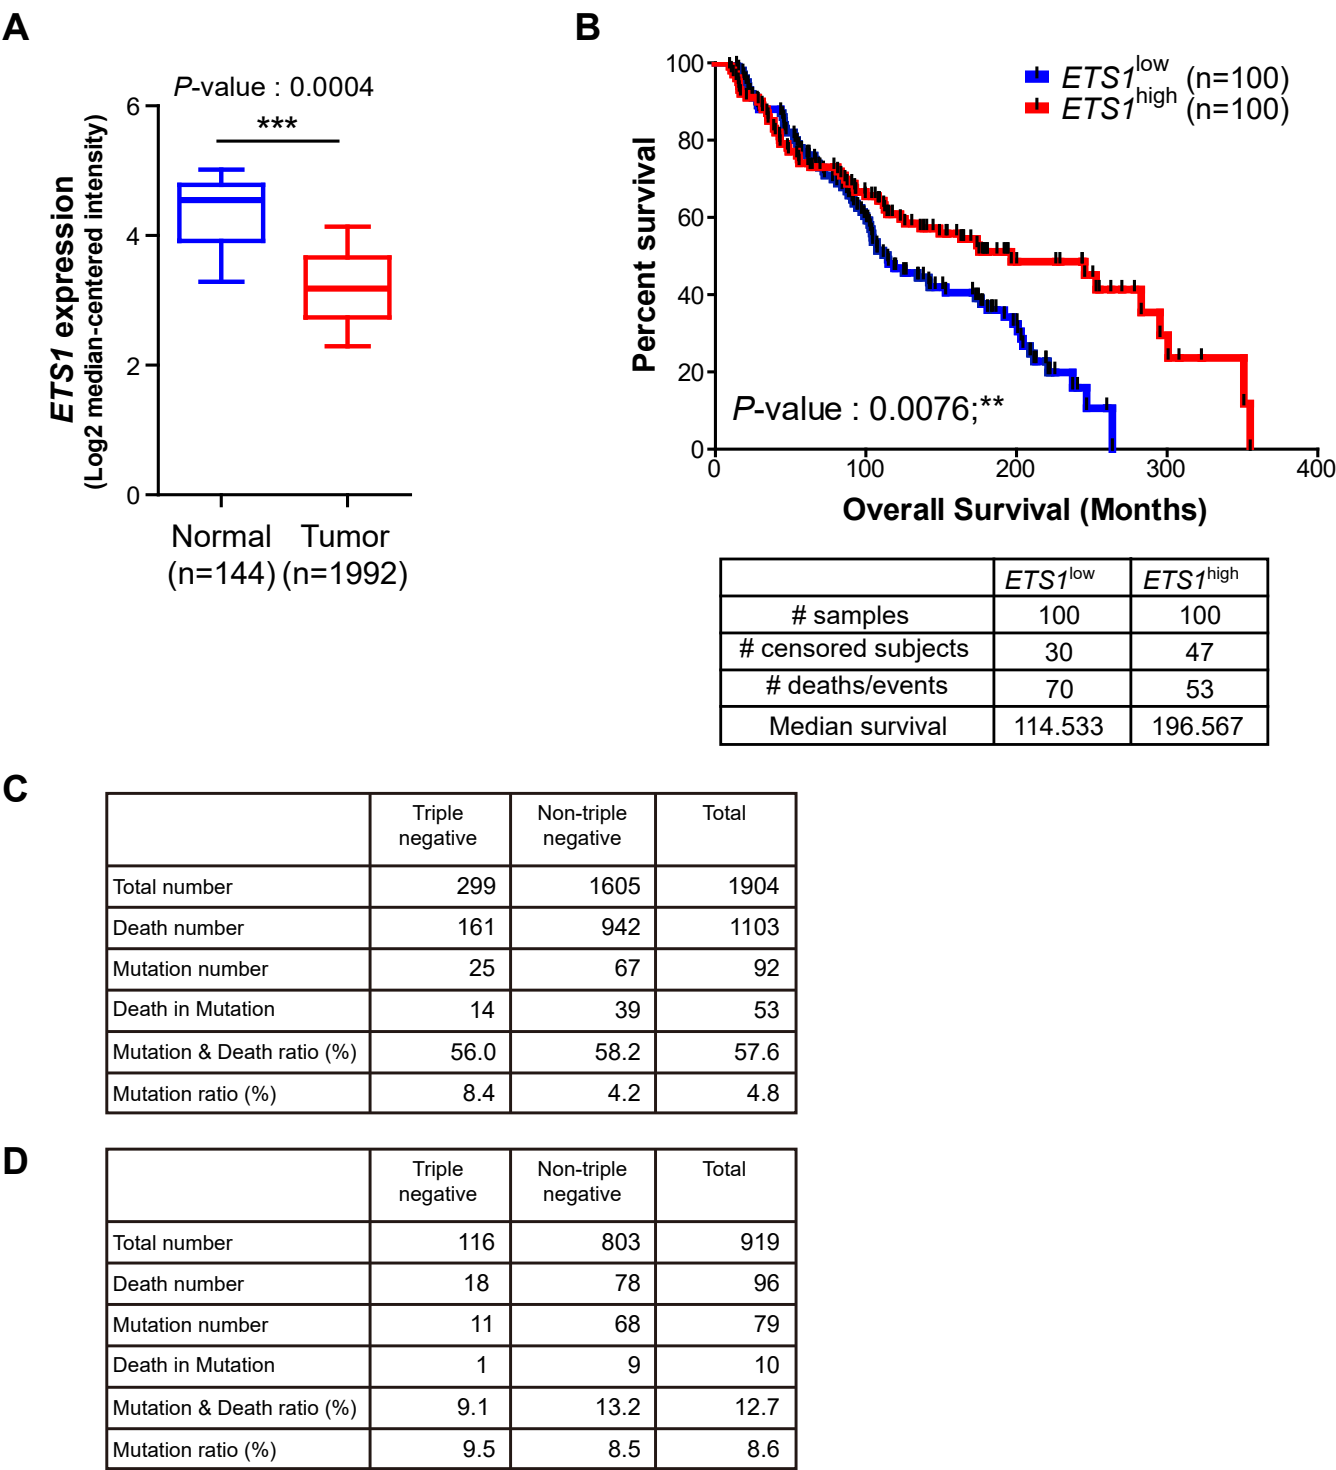

**Supplementary Figure 1.** Comparison of *ETS1* expression between normal and tumor patient specimens in publically available dataset (Curtis). **(A)** Box plot of *ETS1* gene expression between normal and breast cancer tissues in publically available Curtis data set; normal (n=144) and tumor (n=1992). \*\*\**P*<0.001 (Unpaired t test). **(B)** Correlation between *ETS1* expression and survival rate. A total of 1992 samples were divided into *ETS1*<sup>high</sup> group (n = 100) and *ETS1*<sup>low</sup> (n = 100) according to *ETS1* expression levels (*ETS1*<sup>low</sup> or *ETS1*<sup>high</sup> selection criteria are each less than the lower or higher 10% of the total patient). Overall survival analysis based on *ETS1* levels in BRCA patient. The blue or red lines indicate patients with *ETS1*<sup>low</sup> (n=100) or *ETS1*<sup>high</sup> expression (n=100), respectively. *P*-value was calculated with the Log-rank test (*P*-value = 0.0076; \*\*). **(C-D)** Correlation between genetic alteration and survival rate of *ETS1* according to breast cancer subtype in **(C)** Curtis data set and **(D)** TCGA data set.

Supplementary Figure 2.

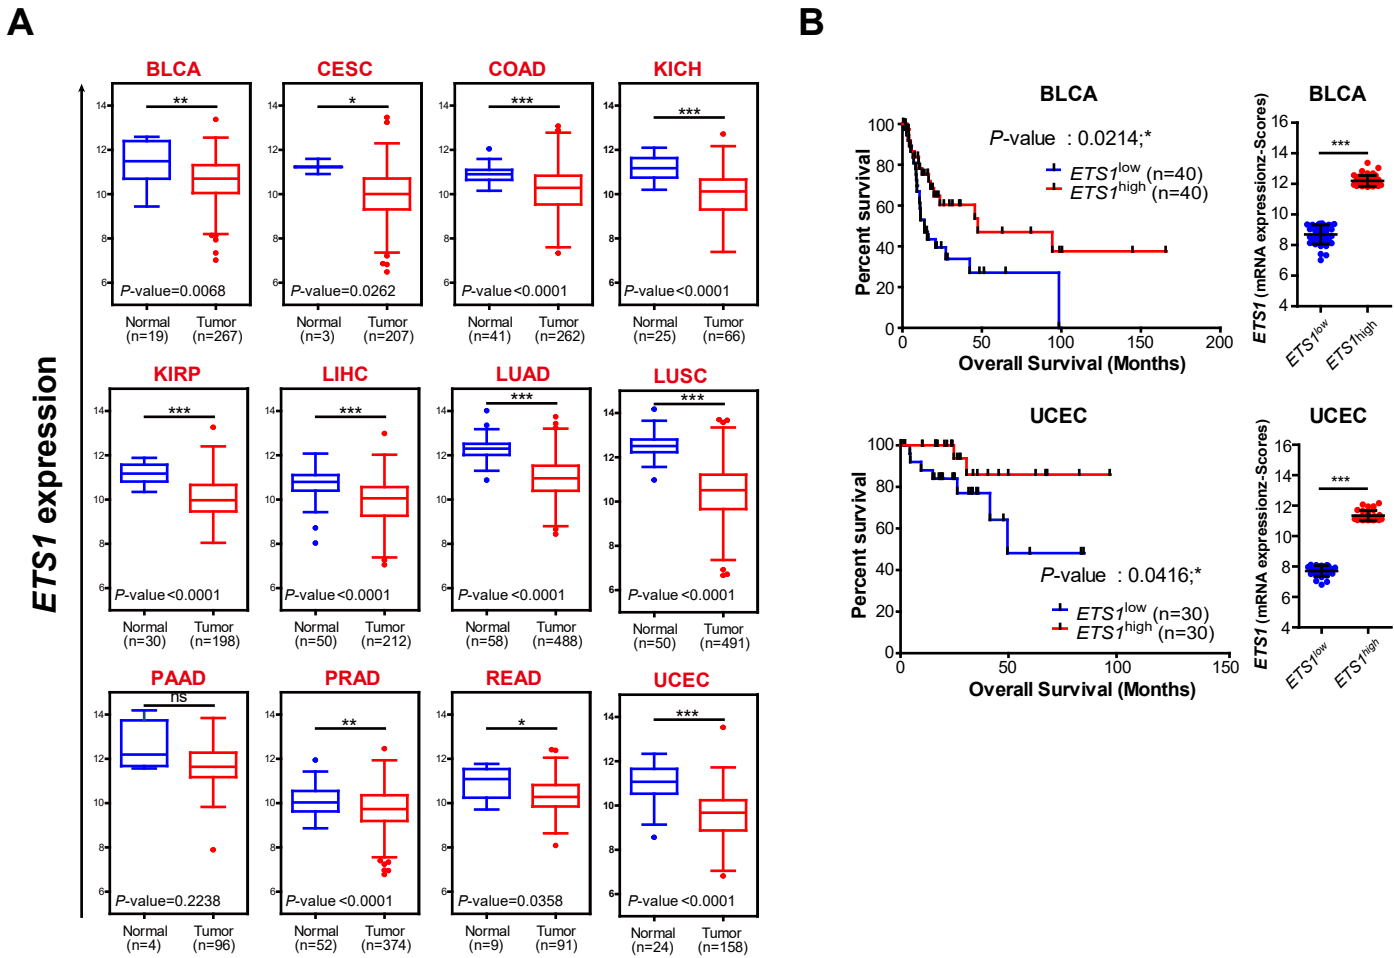

**Supplementary Figure 2.** Comparison of *ETS1* expression between normal and tumor patient specimens in diverse cancer types. **(A)** Tumor types that show a reduced *ETS1* expression. BLCA: Bladder Urothelial Carcinoma; CESC: Cervical squamous cell carcinoma and endocervical adenocarcinoma; COAD: colon adenocarcinoma; KICH: Kidney Chromophobe; KIRP: Kidney renal papillary cell carcinoma; LIHC: Liver hepatocellular carcinoma; LUAD: Lung adenocarcinoma; LUSC: Lung squamous cell carcinoma; PAAD: Pancreatic adenocarcinoma; PRAD: Prostate adenocarcinoma; READ: Rectum adenocarcinoma; UCEC: Uterine corpus endometrial carcinoma. \* $P$ <0.05, \*\* $P$ <0.01, \*\*\* $P$ <0.001 (Unpaired t test). **(B)** Overall survival analysis based on *ETS1* levels in BLCA, UCEC. The blue or red lines indicate patients with *ETS1*<sup>low</sup> or *ETS1*<sup>high</sup> expression, respectively. P-value was calculated with the Log-rank test (\* $P$ <0.05) and \*\*\* $P$ <0.001 (Unpaired t test).

Supplementary Figure 3.

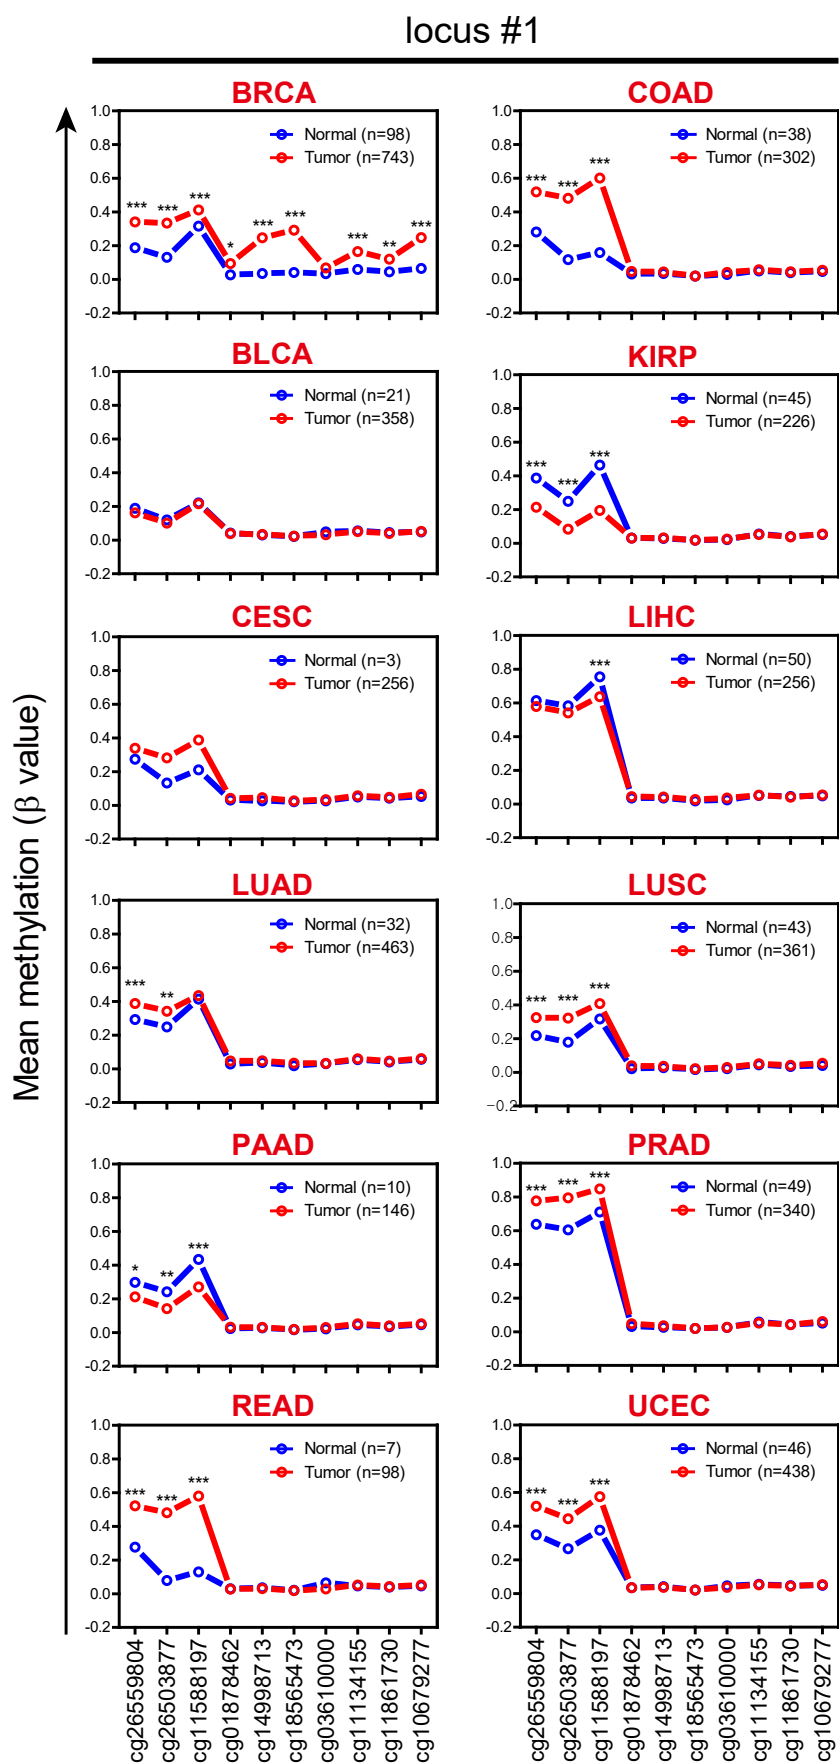

**Supplementary Figure 3.** DNA methylation status on ETS1 promoter (locus #1) in diverse normal and tumor specimens. Analysis of mean methylation  $\beta$ -value on 10 CpG sites of *ETS1* locus #1 between normal (n=98) and BRCA patient (n=743) specimens by TCGA Wanderer tool. The blue or red line represents normal or BRCA specimen, respectively. \* $P < 0.05$ , \*\* $P < 0.01$ , \*\*\* $P < 0.001$  (two-way ANOVA with Bonferroni test).

## Supplementary Figure 4.

**A**

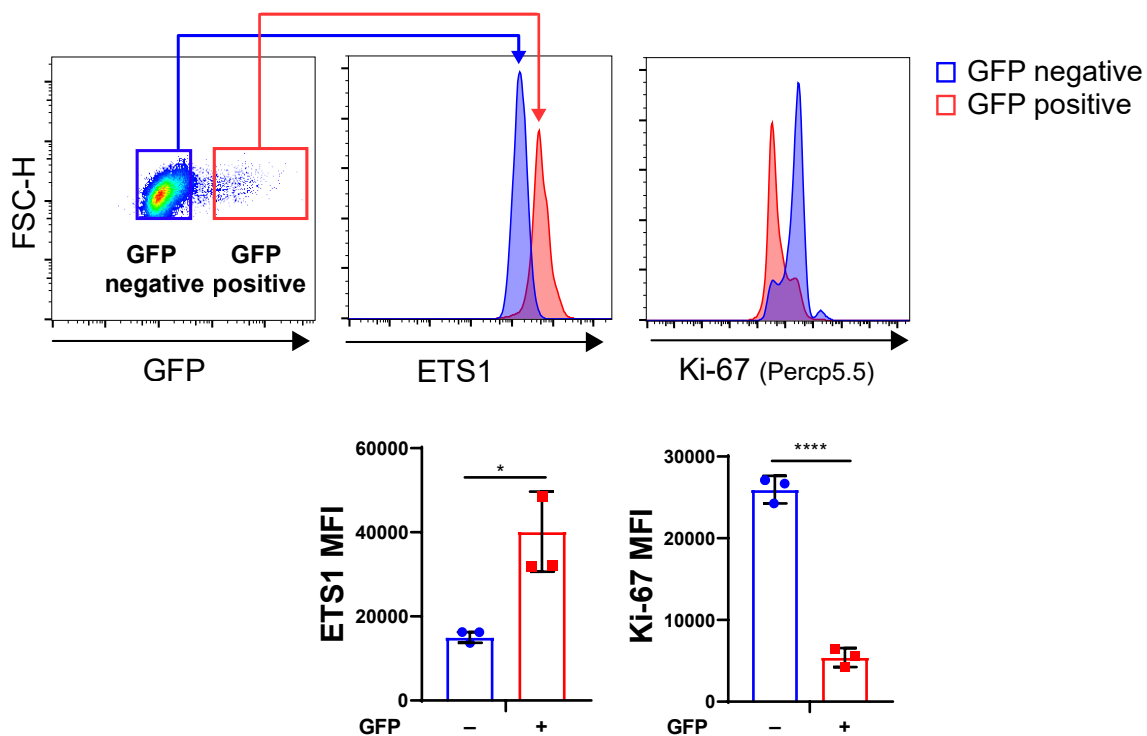

**B**

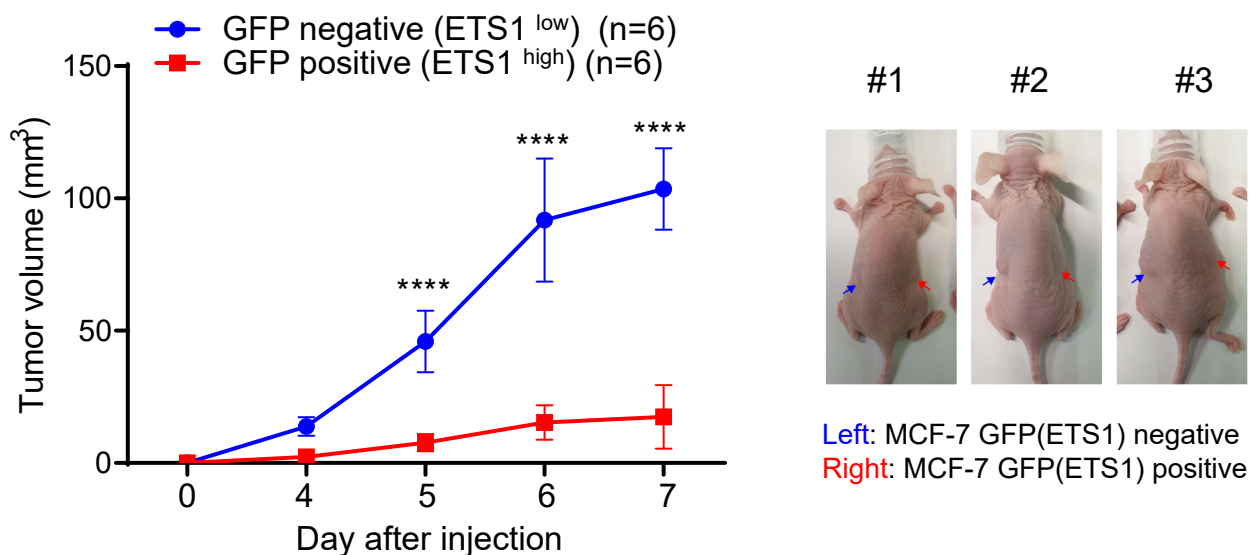

**Supplementary Figure 4.** ETS1 inhibits the proliferation and growth of MCF-7 breast cancer cells *in vitro* as well as *in vivo*. **(A)** MCF-7 cells (ER+, PR+ and HER2-; no ETS1 expression) were transfected with Human cDNA ETS1 GFP vector, and transfected cells were sorted according to GFP -expression. Representative data from three independent experiments. Flow cytometry analysis for ETS1 protein levels and cell proliferation (Ki -67) in GFP negative and positive. \*P<0.05, \*\*P<0.01, \*\*\*P<0.001 \*\*\*\*P<0.0001 (Unpaired t test). **(B)** Tumor growth curves in nude mice after injection of GFP negative (left) and positive (right) MCF-7 cells. Tumor volumes were measured. Images of representative tumor-bearing mice. Blue arrow: MCF-7 GFP(ETS1) negative; Red arrow: MCF-7 GFP(ETS1) positive. \*P<0.05, \*\*P<0.01, \*\*\*P<0.001 \*\*\*\*P<0.0001 (two-way ANOVA with Bonferroni test). Data is representative of three independent experiments.

## Supplementary Figure 5.

## ADAMTS9

TAAATAAAACATGACGCTATCTGGTGCCCCCAATTACTAAGTTACTTTAGTTTGCGGCGTGGG  
AGTGGGGATGGGGATATATCTGGCAACAGCAAGGTAGGGGGGGGTTGCCTAAATTCGTTTTCC  
ATAGTGTCCTCCCTAGCAATTGGTTGGGGATGACCCAAAGAAGGGAGAGGCTGCAAAGCGG  
GAGATAATTTCTTTCTAGGAAAGGAGAGAAAGCCTCCGCTGCGGGGTGCCCTGCCACGAGC  
GAGGACCGGGAGCGCGCTCGGGCCGCGGGGTCCCGGGGGCCGAGCCTGGTTAGCTT  
GCCTCGGGTGACGCTGTCTTTCGCGACGCGCGCGCGCTCTGGCTCCCCATCTCGGC  
CAGTCCCGCACCAGGAGCGTTAGCAGTGTGCGCCAGGATACAACTGCATGGTGCTTCCCA  
CCCCTCCCTCCGCTGCCCCACCCCCCTCCCTCCTTGCTGCGGCGGCGACGC  
GAGGCAGCGGCCGTGGAGAGCGCGCGGAGCCCGGCGCCCGCCAACTTTTACTTTAGG  
AGTCGCTGAGGCTCGCTGCGAGGGTCCCGTCTGCGCTCGGCTGAGCAACGCCGCGCCCTG  
CCGAGAGCTGAGCCGCTCGGGCCGCAAGGAGGAGCCGGAGGAGCAGGAGGAGGAGGAGC  
TGGGCTCGGCTGCTTGGCCGATAATGCCAGCGAGCGGGCAGGAGAGCGAGGAGGAGC  
GCGCTCCGAGGCGCGCCGGGCGCCCTGTGCTGCGCGGATAGCTGAGCGGCTTCTTGAATG  
GGGGGCTGGGGGGGCGGAGGCGGGGGGGCCGCGGGTCCACAGCCTCTCAAATGCCCCCG  
TGCACGCCTCTAGGAGGAGGAGGAGGAGGAGGAGGAGGAGGAGGAGGAGGAGGAGGAGG  
CCAGACCATGTCCCTCCCTCGGCCGCGCGGGACTCGCAGCCGAGGCCCTGCCGGC  
TGCAAGAGGCGGAGGCCAGAGGCGTCACCAGCGCCGGGGCAGCTGTTCTTGTCCTCCCGCCA  
CCTCGCTGAAGTGGGGTTTTCTGAGATTCCTGCCCGGGGAGGAGGAGGAGGAGGAGGAGG  
CTCCCTTTCTGCGCGCGCTGACGCCACTTCCCTCTCGTCTTTTCTCTCTCTCTCTCTCT  
TCTTCTTCCGAGTCTTTTTCTCTCTCTCTCTCTCTCTCTCTCTCTCTCTCTCTCTCTCTCT  
CTGTCCCTTCTC

Red: ETS1 binding sites  
Green: ChIP primer

## NOTCH1

CCGCCCCCGCCGGCCCCACCCCCGCCGGTCCCCCGCCCCCTCCGCGGCCACCTCCTCC  
CGCACGCCCCGTCCGCCTTTGCGCCTCCCCGAGCTGAGCCGCGCGTCCCAGAGCCAGCCT  
CTCCGGGGAGGAGGGACCCGGCGGCGCGGCGTGGGTCCGGAGCGGGCGCTGGGACTAC  
TTCTCGTTTGAAGTTTTAGAGGCCAAAAGTTTGAGCCGGGGC|CGGGAAGG|ATCCGGCTC  
TGGCGTTGCCGCGCTCGGCGACAACGGCGACTGAAATTTGCATGTGAATAAGCGGAGGA  
GCCCCGGGGCGGAATGGGGAGGGCGAGGCCGCGGACAGCCGTGTGCACCGTGCCTGGGC  
CGGGCGGGGAGCAGCTGAGGCCACGTTGGGGGACCCCGGGCCCGGGGCAGGGCTCTGGG

TXNIP

GGCTAGGTTTTAGGGTCAGTGGGATCCTCCTTCCACTGGACCCGGGAGAAGACGCTCAACAG  
 CCCCCTCCTTCCCCTCCTTCTCCTTCTCCTTCCCCCTCCTGCGCCGCTCCAGAG  
 CGCAACAACCATTTTCCAGCCAGGAGCACACCGTGTCCACGCGCCACAGCGATCTCACTGA  
 TTGGTGGGGCTCCTGGTAAACAAGGACCGGGCAGCCAATGGGAGGGATGTGCACGAGGGCA  
 GCACGAGCCTCCGGGCCAGCGCTCGCGTGGCTCTTCTGGCCCCGGGCTACTATATAGAGACG  
 TTCCGCTCCAGCTTGAACTAACCCCTCTTTTTCTCCAAAGGAGTGCTTGTGGAGATCGGA  
 TCTTTCTCCAGCAATTGGGGGAAAGAAGGCTTTTCTCTGACTTCGCTTAGTGTAACCAGCG  
 GCGTATATTTT

# STAT5A

ATTTGGGGGTGAAGAGCAGTTAGGGGCAAGGAGGCCAGCCTCGGACCGCAGCTCAGTCAGAC  
CCTTGACAGTTTCTGATCTTCCTGAACCCCCATCCCGTGGCCTCAAGTTTCTCCACAGCCT  
GGTCCCCAAAATCACCAGGGCACTTTGGTGGGAAATCACCCACACAAGGGGACAAACAAG  
GGGACTGAAAGCAAAAAGAAACCCCAAATTTGACATTTCTGGGTAGTTGTGTTATCTGGAGCCA  
CGACTACAGTCACCTTTCCCAACCAACTCTGACACCCCTTCCCTCTACTCCCTTGGGTGCCCT  
TGTCCTCCTGGGAAAGTTCCATAGCTCCTCCTCCTCCCACTGCATCTCAAAGGGAGAACAG  
GCCTGAAGAAATGGAGAGAAACCCAGACA

**Supplementary Figure 5.** Bioinformatic analysis of promoter regions of representative ETS1 target genes (A) *ADAMTS9*, (B) *NOTCH1*, (C) *TXNIP* and (D) *STAT5A* promoter sequences were analyzed by ECR browser

# Supplementary Figure 6.

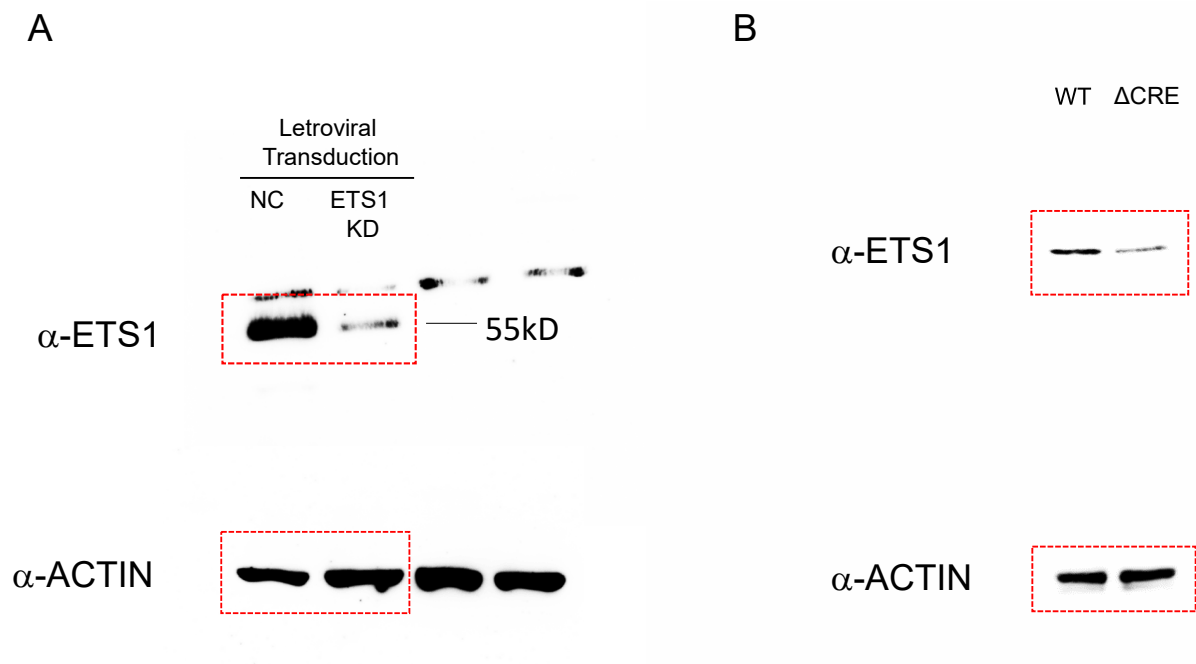

**Supplementary Figure 6.** Full Immuno-blots of the experiments shown in **(A)** Figure 3A **(B)** Figure 3C. Uncropped images are labeled as in the main text and red dot square indicate protein bands of interest.
